# Supplementary material for: The CDK7 inhibitor CT7001 (Samuraciclib) targets proliferation pathways to inhibit advanced prostate cancer
Source: bioRxiv or medRxiv preprint supplement (doi:10.1101/2022.06.29.497030), 2022-06-29
Supplement: Supplementary file [file media-2.pdf]

## SUPPLEMENTARY MATERIALS AND METHODS

### Immunocytochemistry

LNCaP cells seeded on glass coverslips were allowed to adhere overnight before plating medium was replaced with starvation medium (phenol red-free RPMI-1640 supplemented with 5% charcoal-stripped FCS and 2mM L-glutamine). Cells were starved of androgens for 48 hours before treatment with DMSO or 10 $\mu$ M CT7001 in the absence or presence of androgen (10nM mibolerone) for 4 hours. Treated cells were washed with PBS, fixed with 4% paraformaldehyde in PBS for 15 minutes and permeabilized with 0.1% Triton-X diluted in PBS for 10 minutes at room temperature. Non-specific sites were blocked with 10% goat serum diluted in PBS for 1 hour at room temperature. Cells were stained with mouse anti-AR antibody (441) (sc-7305, Santa Cruz Biotechnology, 1:200) diluted in 1% BSA in PBS in a humidified chamber at 4°C overnight. The coverslips were washed 3 times in PBS for 5 minutes followed by staining with Alexa Fluor-594 secondary antibody (Invitrogen, 1:1000) diluted in 1% BSA in PBS for 1 hour at room temperature. Following three PBS washes, the coverslips were mounted on slides using DAPI-fluorescence mounting medium (Abcam). Fluorescence images were captured on a Nikon Eclipse E400 fluorescence upright microscope. For each treatment condition, 3 images were taken from 2 coverslips (6 images per condition). The experiment was repeated twice (n=2 biological repeats). Images were analysed using ImageJ v1.52a. A DAPI staining mask was used to define the nuclear regions of interest (ROI) for measuring mean nuclear AR fluorescence intensity.

### Chromatin immunoprecipitation (ChIP)

LNCaP cells were grown in androgen depleted media for 72 hours before treatment for 4 hours with vehicle (DMSO) or 10  $\mu$ M CT7001 in the presence of 10 nM mibolerone or equivalent vehicle (ethanol). Cells were fixed for 20 minutes with 1% formaldehyde, lysed, and sonicated to produce 300-1500 bp fragments. Chromatin immunoprecipitation was performed as described previously [1] using anti-AR (sc-7305, Santa Cruz Biotechnology) or rabbit mouse IgG at 10 $\mu$ g per sample and 100 $\mu$ L of Protein A Dynabeads (Invitrogen). DNA was isolated from samples using phenol:chloroform:isoamyl alcohol, washed, dried, and resuspended in nuclease-free water. Enrichment across three androgen-responsive elements (AREs) in the human PSA promoter, and PSA and FKBP5 enhancers was quantified by qPCR, with the primers listed in **Supplementary Table 2**. Data was calculated as percent input and normalized to non-specific control.

## SUPPLEMENTARY TABLES

**Supplementary Table 1. Primer sequences for RT-qPCR.**

| Gene    | Primer  | Sequence (5'-3')        |
|---------|---------|-------------------------|
| CDKN1A  | Forward | CGATGGAACTTCGACTTTGTCA  |
| CDKN1A  | Reverse | GCACAAGGGTACAAGACAGTG   |
| GADD45A | Forward | GAGAGCAGAAGACCGAAAGGA   |
| GADD45A | Reverse | CACAACACCACGTTATCGGG    |
| MDM2    | Forward | GAATCATCGGACTCAGGTACATC |
| MDM2    | Reverse | TCTGTCTCACTAATTGCTCTCCT |
| RRM2B   | Forward | AGAGGCTCGCTGTTTCTATGG   |
| RRM2B   | Reverse | GCAAGGCCCAATCTGCTTTTT   |
| BACTIN  | Forward | GGCATCCTCACCTGAAGTA     |
| BACTIN  | Reverse | GGTCATCTTCTCGCGGTTG     |
| GAPDH   | Forward | ATGGGGAAGGTGAAGGTCC     |
| GAPDH   | Reverse | GGGGTCATTGATGGCAACAATA  |
| RPL19   | Forward | GCGGAAGGGTACAGCCAAT     |
| RPL19   | Reverse | AGCAGCCGGCGCAAA         |
| PSA     | Forward | TTGTCTTCCTCACCTGTCC     |
| PSA     | Reverse | AGCTGTGGCTGACCTGAAAT    |

**Supplementary Table 2. TaqMan low-density array qPCR assays**

| <b>Detector</b>       | <b>Description</b>                                           | <b>Response to androgens</b> |
|-----------------------|--------------------------------------------------------------|------------------------------|
| 18S-Hs99999901_s1     | Eukaryotic 18S rRNA                                          | Control                      |
| ABCC4-Hs00988717_m1   | ATP-binding cassette, sub-family C (CFTR/MRP), member 4      | Upregulated                  |
| ABHD2-Hs00199684_m1   | abhydrolase domain containing 2                              | Upregulated                  |
| ACSL3-Hs00244853_m1   | acyl-CoA synthetase long-chain family member 3               | Upregulated                  |
| ALDH1A3-Hs00167476_m1 | aldehyde dehydrogenase 1 family, member A3                   | Upregulated                  |
| ANKH-Hs00219798_m1    | ANKH inorganic pyrophosphate transport regulator             | Upregulated                  |
| DBI-Hs01554584_m1     | diazepam binding inhibitor                                   | Upregulated                  |
| DHCR24-Hs00207388_m1  | 24-dehydrocholesterol reductase                              | Upregulated                  |
| DNAJB9-Hs01052402_m1  | DnaJ (Hsp40) homolog, subfamily B, member 9                  | Upregulated                  |
| ELL2-Hs01023022_m1    | elongation factor, RNA polymerase II, 2                      | Upregulated                  |
| FKBP5-Hs01561006_m1   | FK506 binding protein 5                                      | Upregulated                  |
| GAPDH-Hs99999905_m1   | glyceraldehyde-3-phosphate dehydrogenase                     | Control                      |
| GNMT-Hs00219089_m1    | glycine N-methyltransferase                                  | Upregulated                  |
| HMGCS1-Hs00940429_m1  | 3-hydroxy-3-methylglutaryl-CoA synthase 1 (soluble)          | Upregulated                  |
| HPGD-Hs00960587_m1    | hydroxyprostaglandin dehydrogenase 15-(NAD)                  | Upregulated                  |
| IQGAP2-Hs00183606_m1  | IQ motif containing GTPase activating protein 2              | Upregulated                  |
| KLK2-Hs00428383_m1    | kallikrein-related peptidase 2                               | Upregulated                  |
| KLK3-Hs02576345_m1    | kallikrein-related peptidase 3                               | Upregulated                  |
| LIFR-Hs01123581_m1    | leukemia inhibitory factor receptor alpha                    | Upregulated                  |
| MAF-Hs00193519_m1     | v-maf avian musculoaponeurotic fibrosarcoma oncogene homolog | Upregulated                  |
| MTMR9-Hs00209995_m1   | myotubularin related protein 9                               | Upregulated                  |

|                           |                                                       |             |
|---------------------------|-------------------------------------------------------|-------------|
| NDRG1-<br>Hs00608387_m1   | N-myc downstream regulated 1                          | Upregulated |
| NKX3-1-<br>Hs00171834_m1  | NK3 homeobox 1                                        | Upregulated |
| ORM1-Hs01590791_m1        | orosomuroid 1                                         | Upregulated |
| PDIA5-Hs00895698_m1       | protein disulfide isomerase family A,<br>member 5     | Upregulated |
| PGM3-Hs00985101_m1        | phosphoglucomutase 3                                  | Upregulated |
| PMEPA1-<br>Hs00375306_m1  | prostate transmembrane protein,<br>androgen induced 1 | Upregulated |
| PTPRM-<br>Hs00267809_m1   | protein tyrosine phosphatase, receptor<br>type, M     | Upregulated |
| RAB27A-<br>Hs00608302_m1  | RAB27A, member RAS oncogene<br>family                 | Upregulated |
| RPLP0-<br>Hs99999902_m1   | ribosomal protein, large, P0                          | Control     |
| SEPP1-<br>Hs01032845_m1   | selenoprotein P, plasma, 1                            | Upregulated |
| SLC35F2-<br>Hs00213850_m1 | solute carrier family 35, member F2                   | Upregulated |
| SORD-Hs00162091_m1        | sorbitol dehydrogenase                                | Upregulated |
| TBP-Hs99999910_m1         | TATA box binding protein                              | Control     |
| TMPRSS2-<br>Hs01120965_m1 | transmembrane protease, serine 2                      | Upregulated |
| TPD52-<br>Hs00893105_m1   | tumor protein D52                                     | Upregulated |

**Supplementary Table 3. Primer sequences for ChIP-qPCR.**

| <b>Gene</b>          | <b>Primer</b> | <b>Sequence (5'-3')</b>   |
|----------------------|---------------|---------------------------|
| PSA <sub>prom</sub>  | Forward       | GTGCATCCAGGGTGATCTAGTAATT |
| PSA <sub>prom</sub>  | Reverse       | CACACCCAGAGCTGTGGAA       |
| PSA <sub>enh</sub>   | Forward       | ACAGACCTACTCTGGAGGAAC     |
| PSA <sub>enh</sub>   | Reverse       | AAGACAGCAACACCTTTTT       |
| FKBP5 <sub>enh</sub> | Forward       | GCTCCCTCACACCAGATGACCA    |
| FKBP5 <sub>enh</sub> | Reverse       | CAAATCCAACCCGAGACAGGTGTA  |

## **SUPPLEMENTARY REFERENCES**

1. Leach DA, Mohr A, Giotis ES, Cil E, Isac AM, Yates LL, et al. The antiandrogen enzalutamide downregulates TMPRSS2 and reduces cellular entry of SARS-CoV-2 in human lung cells. *Nat Commun.* 2021;12. doi:10.1038/S41467-021-24342-Y.
2. Jafari R, Almqvist H, Axelsson H, Ignatushchenko M, Lundbäck T, Nordlund P, et al. The cellular thermal shift assay for evaluating drug target interactions in cells. *Nat Protoc.* 2014;9:2100–22. doi:10.1038/NPROT.2014.138.
